# Supplementary material
Source: bioRxiv or medRxiv preprint supplement (https://medrxiv.org/highwire/filestream/84397/field_highwire_adjunct_files/0/2020.06.04.20099556-1.pdf)
Supplement: Supplementary file [file 2020.06.04.20099556-1.pdf]

# A modest increase in <sup>11</sup>C-PK11195-PET TSPO binding in depression is not associated with serum C-reactive protein or body mass index

Julia J. Schubert et al.

## Supplemental material

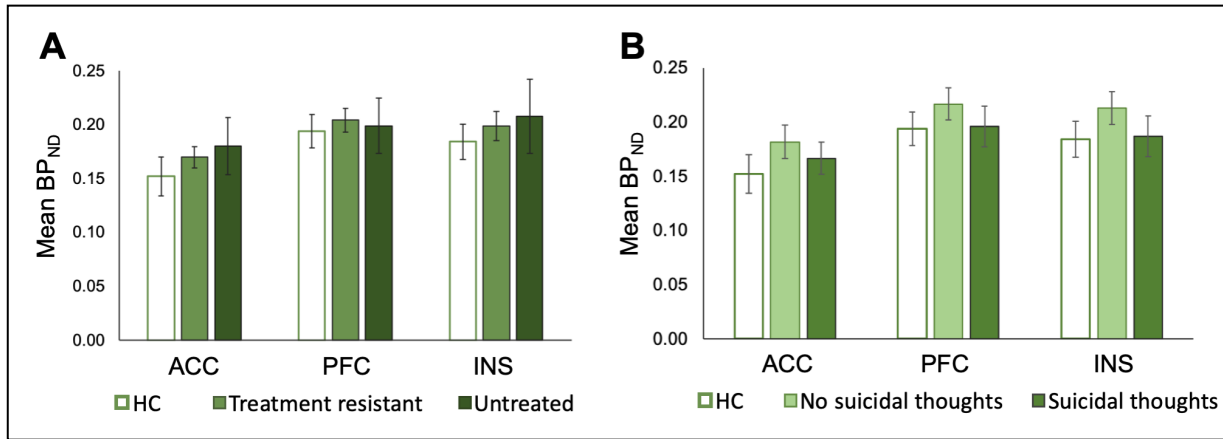

**Figure S1. A.** Group differences in mean <sup>11</sup>C-PK11195 binding potential measurements in anterior cingulate cortex (ACC), prefrontal cortex (PFC), and insular cortex (INS) regions between healthy controls (HC), treatment resistant depression, and untreated depression. **B.** Group differences in mean <sup>11</sup>C-PK11195 binding potential measurements in ACC, PFC, and INS regions between healthy controls, depressed cases without suicidal thoughts, and depressed cases with suicidal thoughts. Error bars represent standard error.

**Table S1.** One-tailed t-statistic results comparing regional TSPO binding potentials (BP<sub>ND</sub>) in anterior cingulate cortex (ACC), prefrontal cortex (PFC), and insular cortex (INS) brain regions between groupings of depressed cases (DC) (all DC, high C-reactive protein (CRP), low CRP) and healthy controls (HC).

| Region |          | t-statistic | P-Value | Mean±SD     |             |
|--------|----------|-------------|---------|-------------|-------------|
|        |          |             |         | DC          | HC          |
| ACC    | All DC   | t(74)=1.996 | 0.025   | 1.171±0.036 |             |
|        | High CRP | t(43)=1.236 | 0.112   | 1.168±0.035 | 1.152±0.046 |
|        | Low CRP  | t(54)=1.958 | 0.028   | 1.174±0.037 |             |
| PFC    | All DC   | t(74)=1.114 | 0.134   | 1.204±0.035 |             |
|        | High CRP | t(43)=0.435 | 0.333   | 1.199±0.030 | 1.194±0.040 |
|        | Low CRP  | t(54)=1.284 | 0.102   | 1.207±0.038 |             |
| INS    | All DC   | t(74)=1.484 | 0.071   | 1.200±0.044 |             |
|        | High CRP | t(43)=1.396 | 0.085   | 1.202±0.045 | 1.184±0.042 |
|        | Low CRP  | t(54)=1.215 | 0.115   | 1.198±0.043 |             |

**Table S2.** Analysis of variance (ANOVA) results comparing regional TSPO binding potentials (BP<sub>ND</sub>) in anterior cingulate cortex (ACC), prefrontal cortex (PFC), and insular cortex (INS) brain regions between groupings of depressed cases (DC) (all DC, high C-reactive protein (CRP), low CRP) and healthy controls (HC).

| Region                                  |          | F-statistic   | P-Value |
|-----------------------------------------|----------|---------------|---------|
| <b>Controlled for age</b>               |          |               |         |
| All regions                             | All DC   | F(1,73)=3.421 | 0.068   |
|                                         | High CRP | F(1,42)=1.413 | 0.241   |
|                                         | Low CRP  | F(1,53)=3.024 | 0.088   |
| ACC                                     | All DC   | F(1,73)=4.880 | 0.030   |
|                                         | High CRP | F(1,42)=1.559 | 0.219   |
|                                         | Low CRP  | F(1,53)=4.892 | 0.031   |
| PFC                                     | All DC   | F(1,73)=1.156 | 0.286   |
|                                         | High CRP | F(1,42)=0.191 | 0.665   |
|                                         | Low CRP  | F(1,53)=1.364 | 0.248   |
| INS                                     | All DC   | F(1,73)=2.567 | 0.113   |
|                                         | High CRP | F(1,42)=1.929 | 0.172   |
|                                         | Low CRP  | F(1,53)=1.769 | 0.189   |
| <b>Controlled for age and sex</b>       |          |               |         |
| All regions                             | All DC   | F(1,72)=5.590 | 0.021   |
|                                         | High CRP | F(1,41)=3.752 | 0.060   |
|                                         | Low CRP  | F(1,52)=4.102 | 0.048   |
| ACC                                     | All DC   | F(1,72)=6.599 | 0.012   |
|                                         | High CRP | F(1,41)=3.376 | 0.073   |
|                                         | Low CRP  | F(1,52)=5.720 | 0.020   |
| PFC                                     | All DC   | F(1,72)=2.589 | 0.112   |
|                                         | High CRP | F(1,41)=0.999 | 0.323   |
|                                         | Low CRP  | F(1,52)=2.261 | 0.139   |
| INS                                     | All DC   | F(1,72)=3.973 | 0.050   |
|                                         | High CRP | F(1,41)=4.551 | 0.039   |
|                                         | Low CRP  | F(1,52)=2.365 | 0.130   |
| <b>Controlled for age, sex, and BMI</b> |          |               |         |
| All regions                             | All DC   | F(1,71)=6.971 | 0.010   |
|                                         | High CRP | F(1,40)=7.224 | 0.010   |
|                                         | Low CRP  | F(1,51)=5.708 | 0.021   |
| ACC                                     | All DC   | F(1,71)=9.067 | 0.004   |
|                                         | High CRP | F(1,40)=5.741 | 0.021   |
|                                         | Low CRP  | F(1,51)=8.815 | 0.005   |
| PFC                                     | All DC   | F(1,71)=3.858 | 0.053   |
|                                         | High CRP | F(1,40)=3.707 | 0.061   |
|                                         | Low CRP  | F(1,51)=3.460 | 0.069   |
| INS                                     | All DC   | F(1,71)=3.848 | 0.054   |
|                                         | High CRP | F(1,40)=6.678 | 0.014   |
|                                         | Low CRP  | F(1,51)=2.628 | 0.111   |

**Table S3.** Correlation between regional TSPO binding potentials and experimental variables in anterior cingulate cortex (ACC), prefrontal cortex (PFC), and insular cortex (INS) regions in depressed cases (DC) and healthy controls (HC)

| Experimental Variable                   |          | Region, r Value (P Value)* |               |               |
|-----------------------------------------|----------|----------------------------|---------------|---------------|
| Variable only                           |          | ACC                        | PFC           | INS           |
| CRP                                     | All DC   | -0.047(0.745)              | -0.073(0.610) | 0.053(0.710)  |
|                                         | High CRP | -0.127(0.593)              | -0.102(0.670) | -0.050(0.833) |
|                                         | Low CRP  | 0.034(0.856)               | 0.064(0.734)  | 0.031(0.867)  |
| HDRS                                    | All DC   | -0.009(0.951)              | -0.035(0.812) | 0.080(0.582)  |
|                                         | High CRP | 0.486(0.035)*              | 0.223(0.359)  | 0.501(0.029)* |
|                                         | Low CRP  | -0.247(0.180)              | -0.088(0.638) | -0.186(0.317) |
| <b>Controlled for age</b>               |          |                            |               |               |
| CRP                                     | All DC   | -0.171(0.241)              | -0.184(0.207) | -0.035(0.812) |
|                                         | High CRP | -0.276(0.252)              | -0.173(0.478) | -0.218(0.371) |
|                                         | Low CRP  | -0.024(0.901)              | 0.098(0.605)  | 0.044(0.816)  |
| HDRS                                    | All DC   | -0.052(0.723)              | -0.047(0.746) | 0.041(0.781)  |
|                                         | High CRP | 0.294(0.236)               | 0.112(0.658)  | 0.434(0.072)  |
|                                         | Low CRP  | -0.233(0.216)              | -0.110(0.564) | -0.219(0.245) |
| <b>Controlled for age and sex</b>       |          |                            |               |               |
| CRP                                     | All DC   | -0.142(0.334)              | -0.127(0.391) | -0.002(0.988) |
|                                         | High CRP | -0.193(0.458)              | -0.194(0.456) | -0.124(0.634) |
|                                         | Low CRP  | 0.022(0.911)               | 0.098(0.611)  | 0.043(0.827)  |
| HDRS                                    | All DC   | -0.077(0.605)              | -0.103(0.487) | 0.018(0.901)  |
|                                         | High CRP | 0.279(0.278)               | 0.086(0.743)  | 0.427(0.087)  |
|                                         | Low CRP  | -0.258(0.177)              | -0.195(0.310) | -0.247(0.197) |
| <b>Controlled for age, sex, and BMI</b> |          |                            |               |               |
| CRP                                     | All DC   | -0.155(0.298)              | -0.125(0.403) | -0.042(0.778) |
|                                         | High CRP | -0.213(0.428)              | -0.193(0.475) | -0.124(0.646) |
|                                         | Low CRP  | 0.064(0.747)               | 0.072(0.714)  | 0.012(0.950)  |
| HDRS                                    | All DC   | -0.077(0.607)              | -0.104(0.486) | 0.022(0.884)  |
|                                         | High CRP | 0.354(0.178)               | 0.073(0.788)  | 0.432(0.095)  |
|                                         | Low CRP  | -0.269(0.167)              | -0.190(0.333) | -0.242(0.215) |

**Table S4.** Correlation between regional TSPO binding potential (ACC: anterior cingulate cortex; PFC: prefrontal cortex; INS: insular cortex) and C-reactive protein (CRP), Hamilton depression rating scale (HDRS), and body mass index (BMI) in depressed cases.

|     | PFC                | INS                | CRP                 | HDRS                | BMI                |
|-----|--------------------|--------------------|---------------------|---------------------|--------------------|
| ACC | r=0.483<br>P<0.001 | r=0.757<br>P<0.001 | r=-0.047<br>P=0.745 | r=-0.009<br>P=0.951 | r=-0.19<br>P=0.895 |
|     | PFC                | r=0.456<br>P=0.001 | r=-0.073<br>P=0.610 | r=-0.035<br>P=0.812 | r=0.112<br>P=0.434 |
|     |                    | INS                | r=0.053<br>P=0.710  | r=0.080<br>P=0.582  | r=0.044<br>P=0.760 |
|     |                    |                    | CRP                 | r=0.302<br>P=0.033  | r=0.462<br>P=0.001 |
|     |                    |                    |                     | HDRS                | r=0.012<br>P=0.935 |

**Table S5.** Correlation between regional TSPO binding potential (ACC: anterior cingulate cortex; PFC: prefrontal cortex; INS: insular cortex) and C-reactive protein (CRP), Hamilton depression rating scale (HDRS), and body mass index (BMI) in healthy controls.

|     | PFC                | INS                | CRP                 | HDRS               | BMI                 |
|-----|--------------------|--------------------|---------------------|--------------------|---------------------|
| ACC | r=0.755<br>P<0.001 | r=0.796<br>P<0.001 | r=-0.162<br>P=0.438 | r=0.204<br>P=0.327 | r=-0.045<br>P=0.831 |
|     | PFC                | r=0.548<br>P=0.005 | r=0.271<br>P=0.190  | r=0.001<br>P=0.995 | r=0.003<br>P=0.990  |
|     |                    | INS                | r=0.243<br>P=0.241  | r=0.401<br>P=0.047 | r=0.059<br>P=0.780  |
|     |                    |                    | CRP                 | r=0.322<br>P=0.117 | r=0.323<br>P=0.116  |
|     |                    |                    |                     | HDRS               | r=-0.026<br>P=0.903 |
